# Supplementary material for: Preparation of water-dispersible TiO2 nanoparticles from titanium tetrachloride using urea hydrogen peroxide as an oxygen donor
Source: Royal Society of Chemistry journal article supplement (doi:10.1039/c3ce41561a), 2013-01-01
Supplement: c3ce41561a.pdf [file c3ce41561a.pdf]

**Electronic Supplementary Information (ESI) for:**

**Preparation of water-dispersible TiO<sub>2</sub> nanoparticles  
from titanium tetrachloride using urea hydrogen  
peroxide as an oxygen donor**

Naoko Watanabe,<sup>a</sup> Taichi Kaneko,<sup>a</sup> Yuko Uchimaru,<sup>b</sup> Sayaka Yanagida,<sup>c</sup>  
Atsuo Yasumori<sup>c</sup> and Yoshiyuki Sugahara<sup>a,d</sup>

<sup>a</sup> *Department of Applied Chemistry, School of Advanced Science and Engineering,  
Waseda University, Ohkubo-3, Shinjuku-ku, Tokyo 169-8555, Japan.*

<sup>b</sup> *National Institute of Advanced Industrial Science and Technology (AIST),  
Central 5, Higashi, Tsukuba, Ibaraki 305-8565, Japan*

<sup>c</sup> *Tokyo University of Science, Yamazaki-2641, Noda, Chiba 278-8510, Japan*

<sup>d</sup> *Kagami Memorial Laboratory for Materials Science and Technology,  
Waseda University, Nishiwaseda-2, Shinjuku-ku, Tokyo, 169-0051, Japan*

*E-mail: ys6546@waseda.jp*

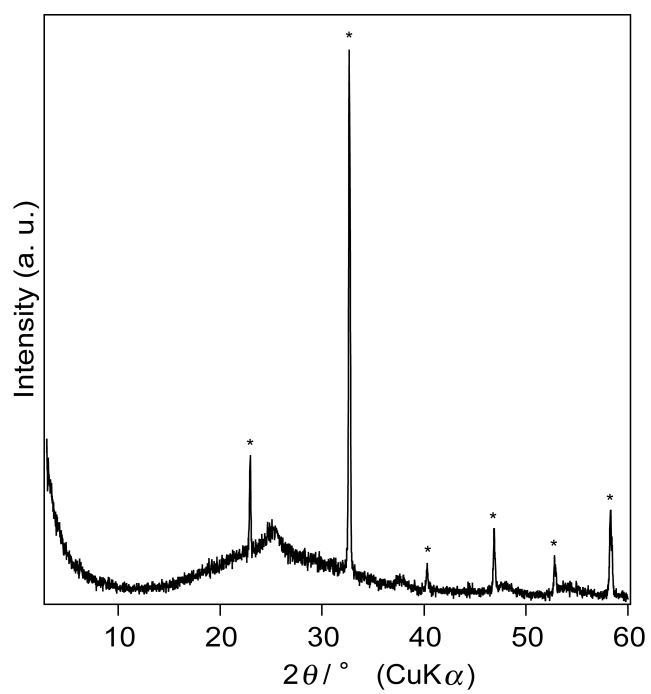

**Fig. S1** XRD pattern of TiO<sub>2</sub>\_70h washed twice with ethanol (\*: NH<sub>4</sub>Cl).

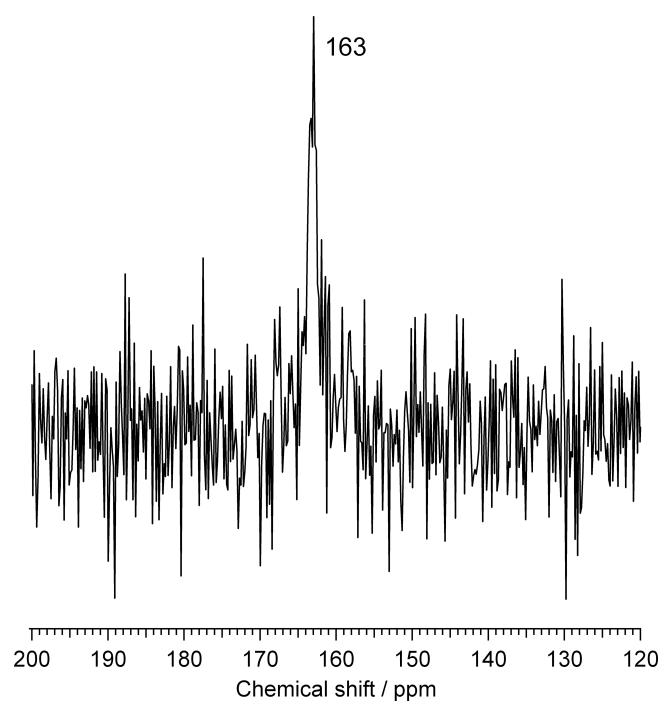

**Fig. S2** Carbon-13 CP/MAS NMR spectrum of TiO<sub>2</sub>\_30h.

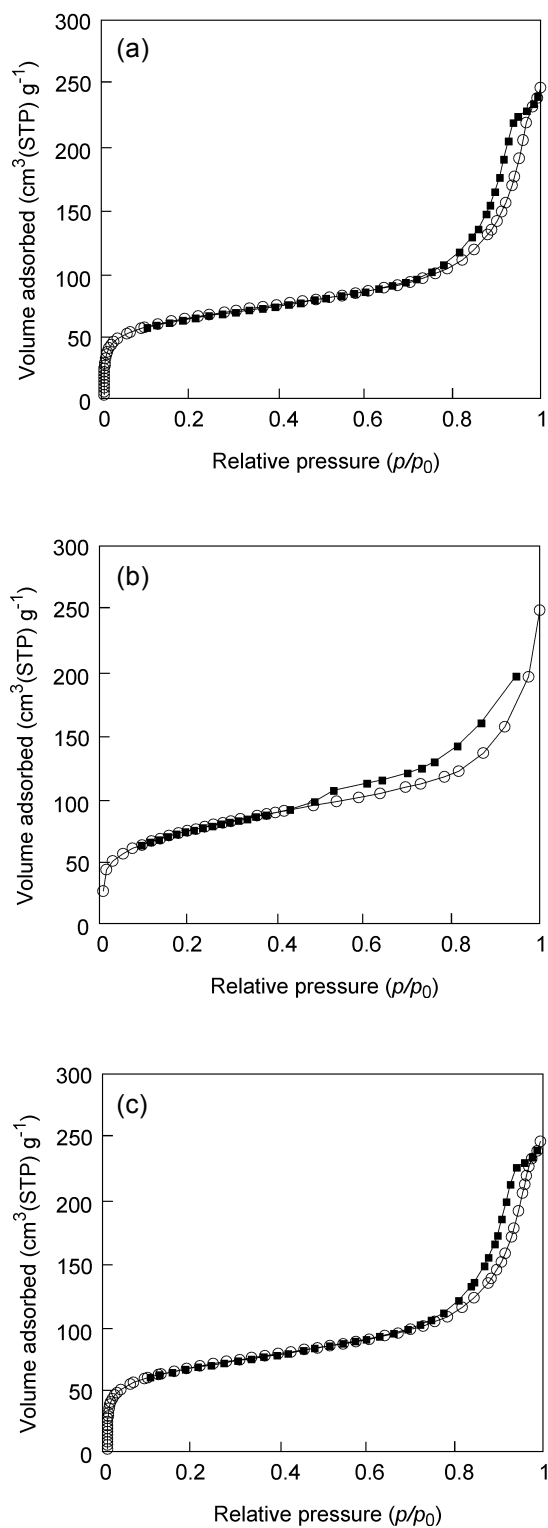

**Fig. S3** Nitrogen adsorption-desorption isotherms of (a) TiO<sub>2</sub>\_30h, (b) TiO<sub>2</sub>\_42h, and (c) TiO<sub>2</sub>\_70h. (White circle: adsorption and black circle: desorption isotherm).

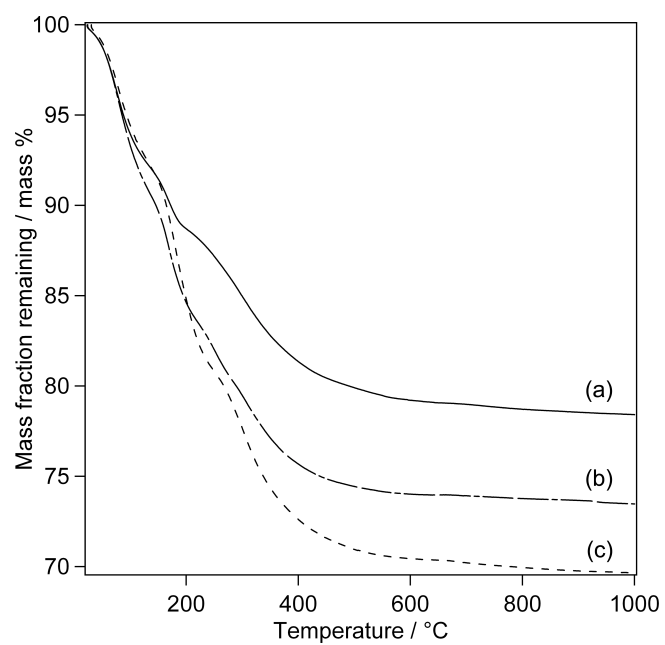

**Fig. S4** TG curves of (a) TiO<sub>2</sub>\_42h, (b) TiO<sub>2</sub>\_70h and (c) TiO<sub>2</sub>\_30h.

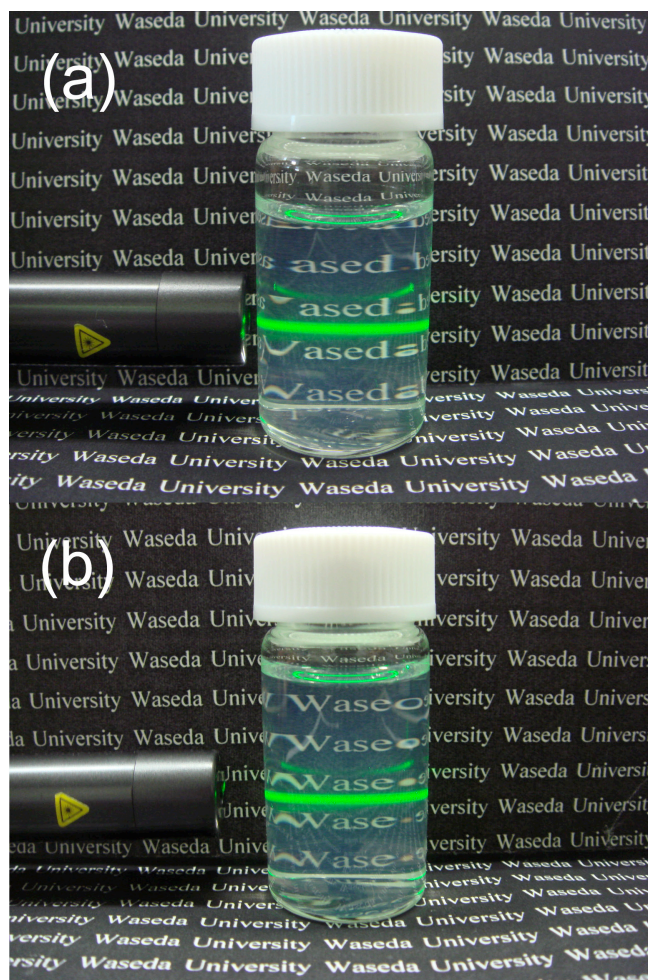

**Fig. S5** Photographs of water-dispersible (a)TiO<sub>2</sub>\_30h and (b)TiO<sub>2</sub>\_42h.

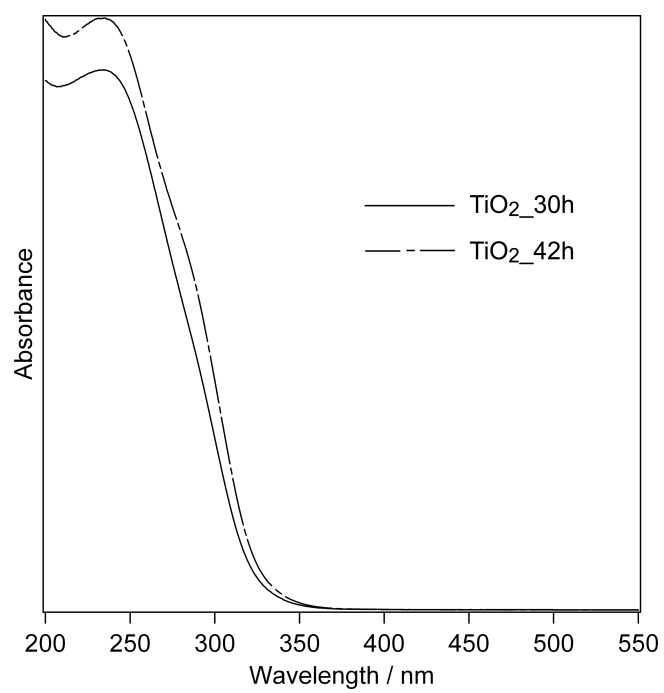

**Fig. S6** UV-Vis spectra of TiO<sub>2</sub>\_30h and TiO<sub>2</sub>\_42h.
